# Supplementary material
Source: HighWire-hosted journal article supplement (https://erj.ersjournals.com/content/56/5/2002697)
Supplement: inline-supplementary-material-1 [file inline-supplementary-material-1.pdf]

|                                  |              | Total (n=46)      | Survived (n=31)   | Died (n=15)        |
|----------------------------------|--------------|-------------------|-------------------|--------------------|
| Hb (g/L)                         | Mean ± SD    | 107 ± 29          | 108 ± 28          | 107 ± 32           |
|                                  | Median [IQR] | 98 [83-130]       | 98 [86-127]       | 98 [81-129]        |
|                                  | Range        | 63-173            | 66-163            | 63-173             |
| WBC (10 <sup>9</sup> /L)         | Mean ± SD    | 13.9 ± 6.6        | 13.1 ± 6.5        | 15.4 ± 6.6         |
|                                  | Median [IQR] | 12.9 [8.5-18.6]   | 11.0 [8.3-17.2]   | 13.8 [9.9-20.5]    |
|                                  | Range        | 1.6-32.0          | 1.6-32.0          | 6.2-26.0           |
| Platelets (10 <sup>9</sup> /L)   | Mean ± SD    | 329 ± 139         | 346 ± 150         | 297 ± 107          |
|                                  | Median [IQR] | 324 [210-423]     | 335 [210-444]     | 293 [248-385]      |
|                                  | Range        | 79-657            | 79-657            | 88-457             |
| Neutrophils (10 <sup>9</sup> /L) | Mean ± SD    | 10.63 ± 5.26      | 9.52 ± 4.51       | 12.76 ± 5.91       |
|                                  | Median [IQR] | 9.59 [6.51-13.28] | 8.20 [6.30-12.51] | 12.38 [8.18-16.80] |
|                                  | Range        | 1.20-23.37        | 1.20-19.47        | 3.97-23.37         |
| Lymphocytes (10 <sup>9</sup> /L) | Mean ± SD    | 1.27 ± 0.71       | 1.37 ± 0.77       | 1.06 ± 0.54        |
|                                  | Median [IQR] | 1.10 [0.73-1.63]  | 1.28 [0.81-1.68]  | 0.84 [0.70-1.21]   |
|                                  | Range        | 0.20-3.35         | 0.20-3.35         | 0.50-2.40          |
| Eosinophils (10 <sup>9</sup> /L) | Mean ± SD    | 0.25 ± 0.47       | 0.33 ± 0.56       | 0.09 ± 0.14        |
|                                  | Median [IQR] | 0.10 [0.00-0.20]  | 0.11 [0.02-0.25]  | 0.01 [0.00-0.13]   |
|                                  | Range        | 0.00-2.60         | 0.00-2.60         | 0.00-0.50          |
| CRP (mg/L)                       | Mean ± SD    | 134 ± 108         | 118 ± 105         | 163 ± 119          |
|                                  | Median [IQR] | 93 [33-228]       | 72 [33-200]       | 172 [54-264]       |
|                                  | Range        | 0-360             | 0-333             | 8-360              |

**Supplementary Table S1 Full blood counts and C-reactive protein for pneumothorax and COVID-19**

Hb = haemoglobin; WBC = white blood cells; CRP = C-reactive protein; SD = standard deviation; IQR = interquartile range.

| Ethnic Group                    | n (%)    |
|---------------------------------|----------|
| White                           | 34 (48%) |
| South Asian (Indian, Pakistani) | 8 (11%)  |
| Chinese                         | 2 (3%)   |
| Other Asian Background          | 8 (11%)  |
| Black (African, Caribbean)      | 5 (7%)   |
| Other                           | 14 (20%) |

**Supplementary Table S2 Ethnicity for pneumothorax/pneumomediastinum and COVID-19**
